# Supplementary material for: Inhibition of autophagy by chloroquine prevents resistance to PI3K/AKT inhibitors and potentiates their antitumor effect in combination with paclitaxel in triple negative breast cancer models
Source: PubMed Central journal article supplement (PMC9235112; doi:10.1186/s12967-022-03462-z), 2022-06-27

**Fig. S1**

**MDAMB361**

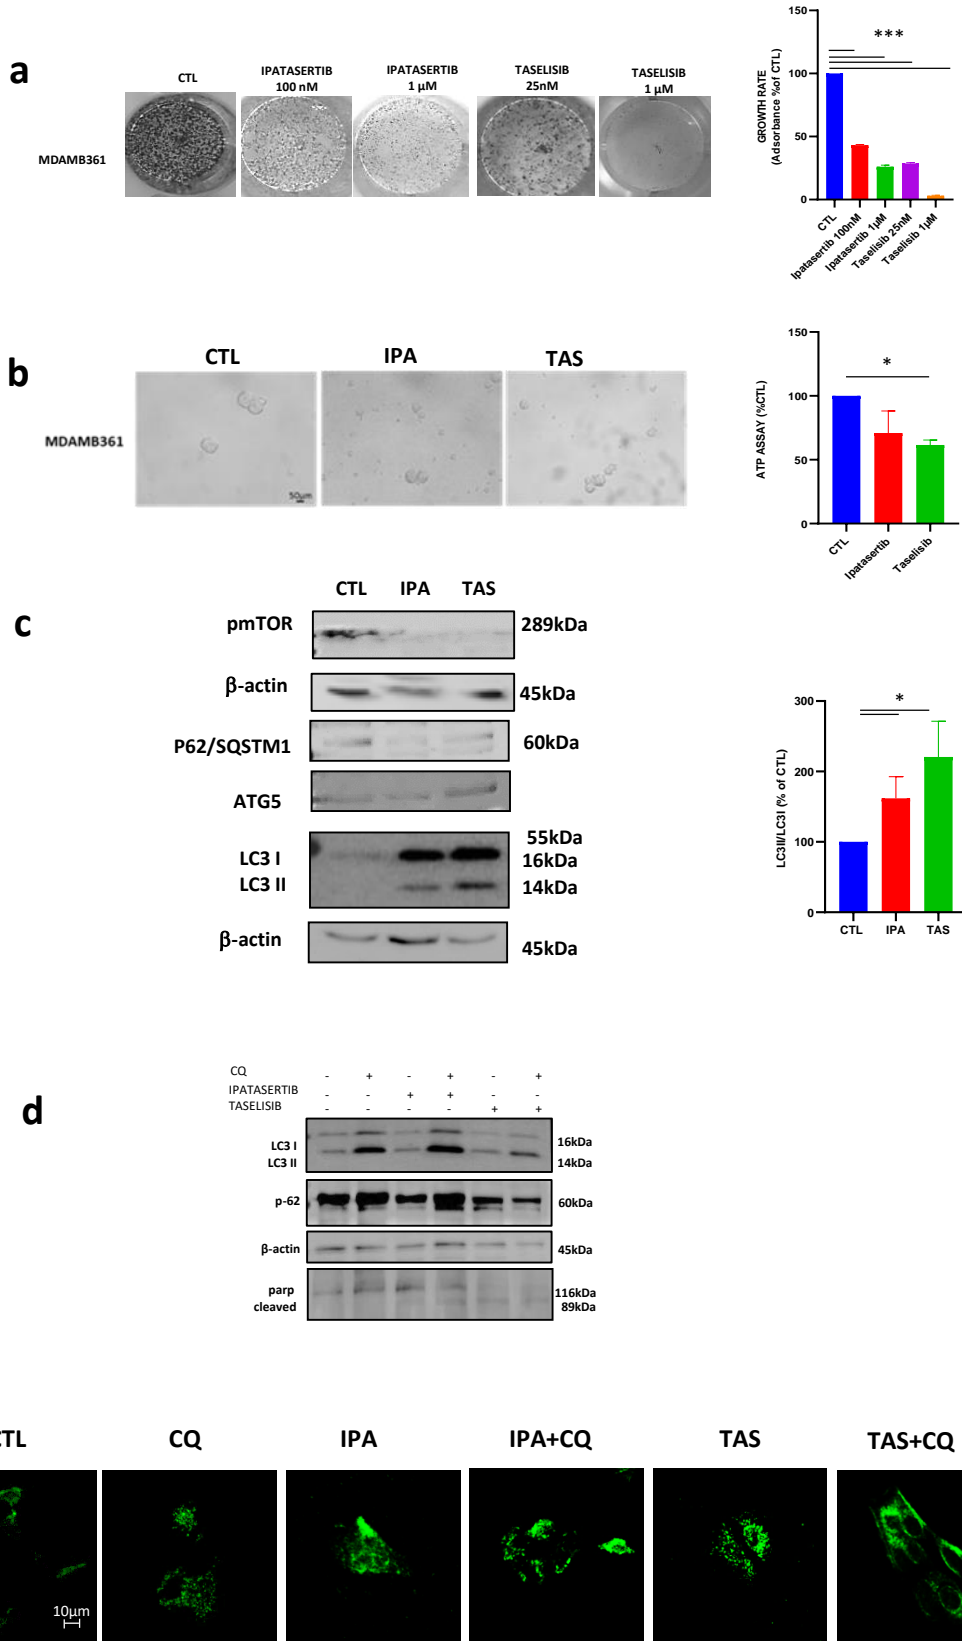

**Fig. S2**

**a**

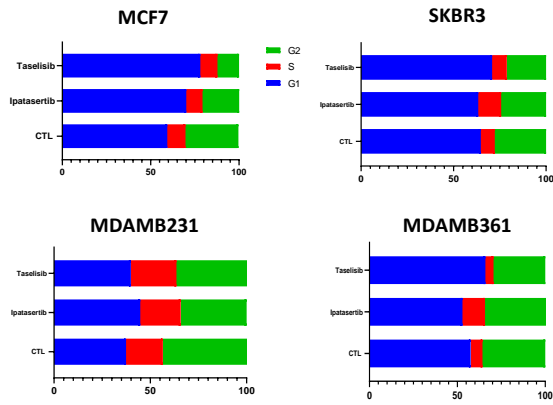

**b**

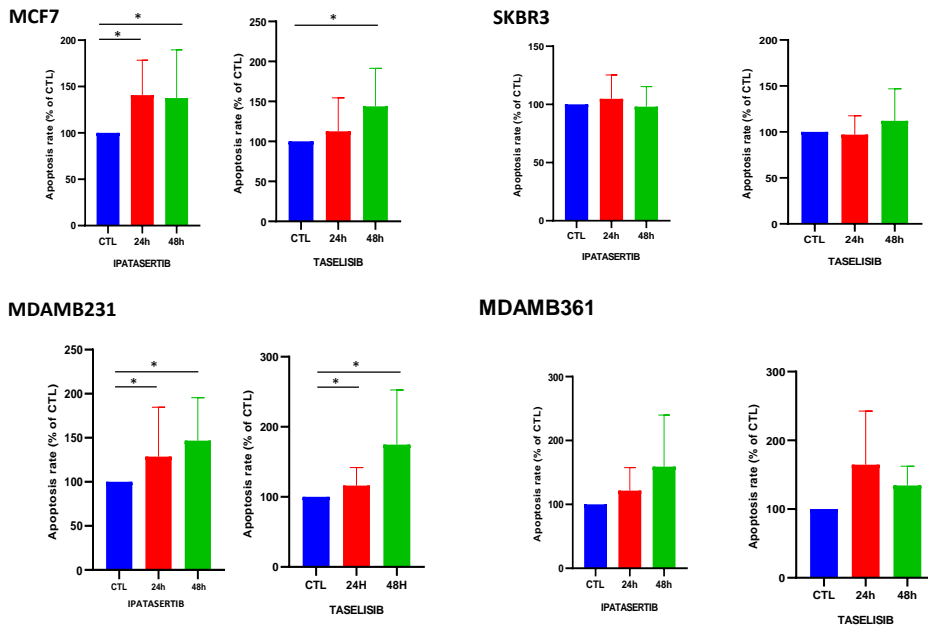

**Fig. S3**

**MDAMB231**

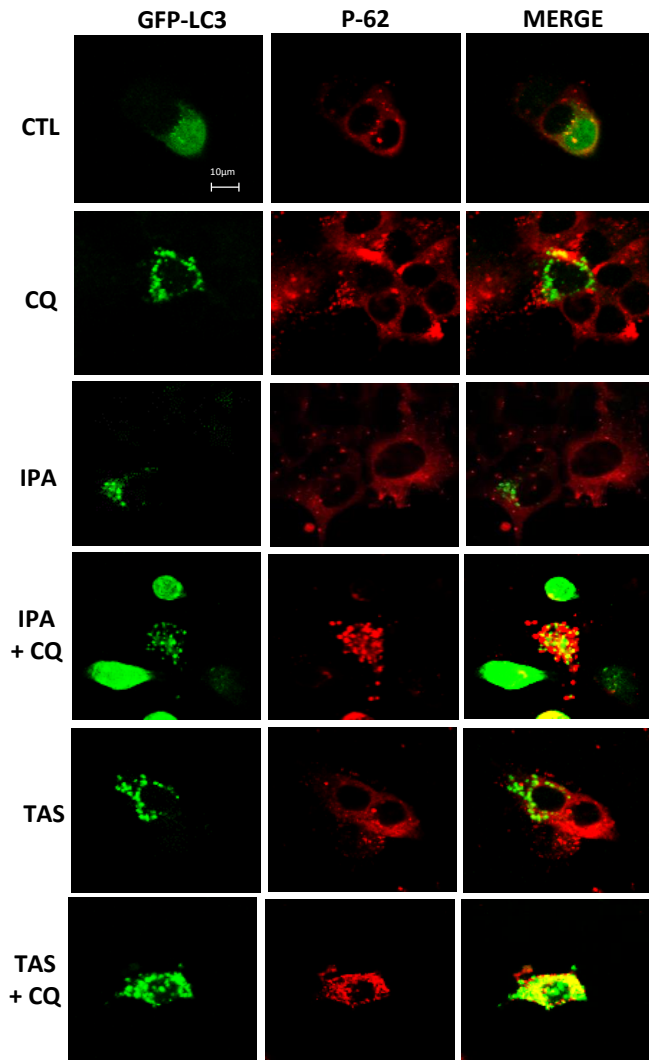

**Fig. S4**

**a**

**MCF7**

**SKBR3**

**MDAMB361**

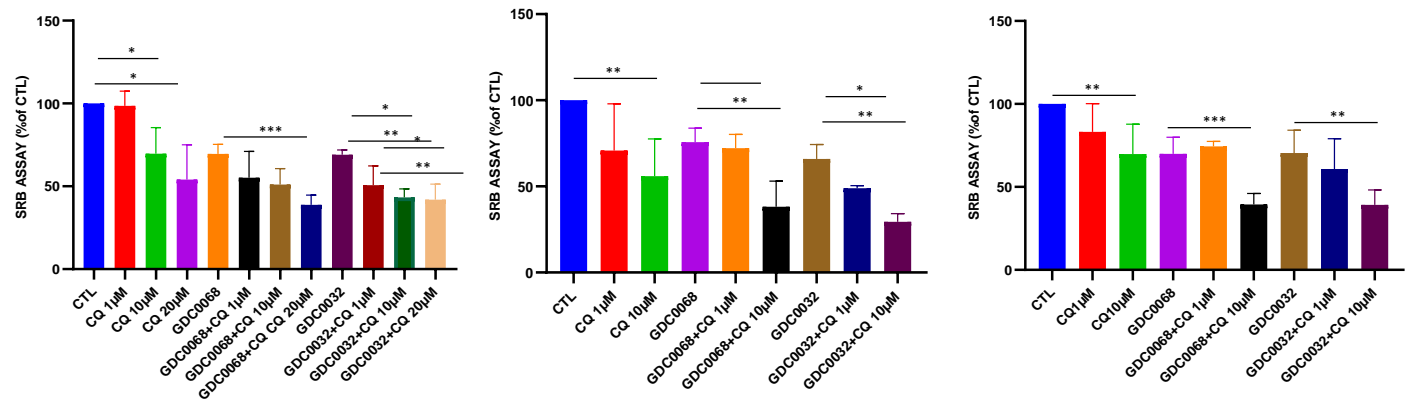

**b**

**MCF7**

**SKBR3**

**MDAMB231**

**MDAMB361**

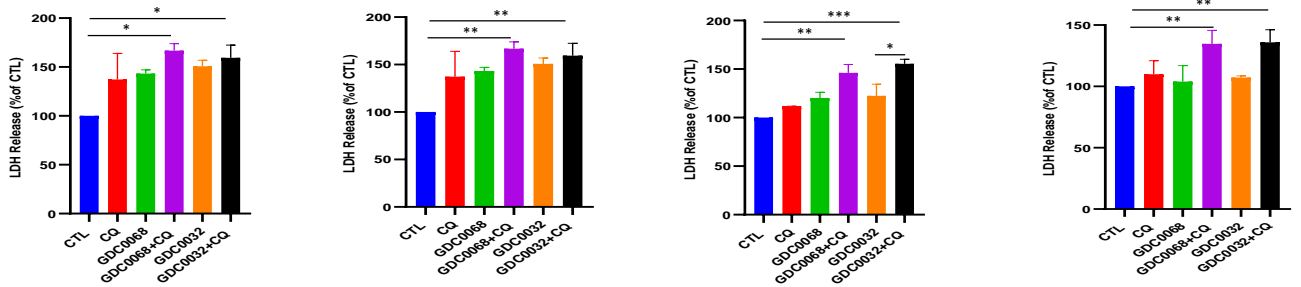

**Fig. S5**

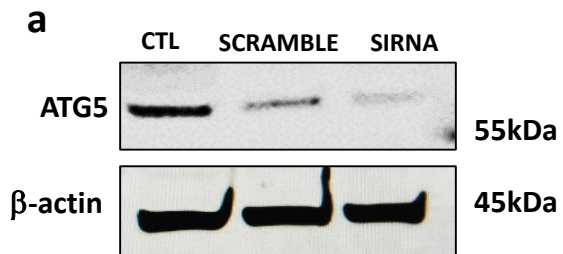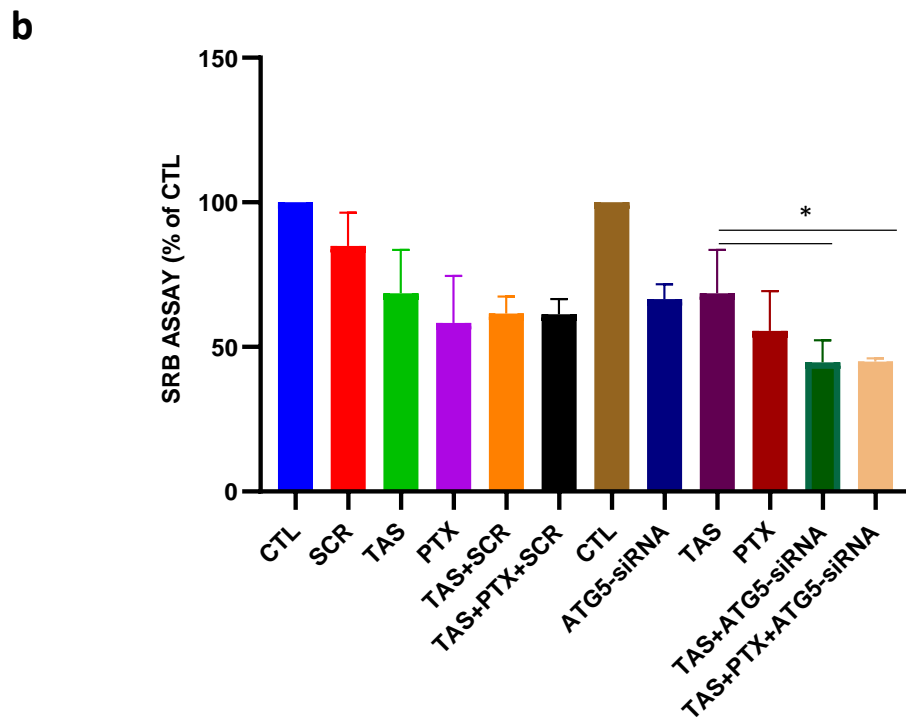

Supplement: 12967_2022_3462_MOESM1_ESM.pdf [file 12967_2022_3462_MOESM1_ESM.pdf]
